# Supplementary material
Source: Springer Nature journal article supplement (https://www.springermedizin.de/resource/supplementary/13054_2013_1761_MOESM3_ESM.pdf/9711558)

Pre-existing factors

- Genetics
- Medical illness
- Medication (especially antithrombotics)

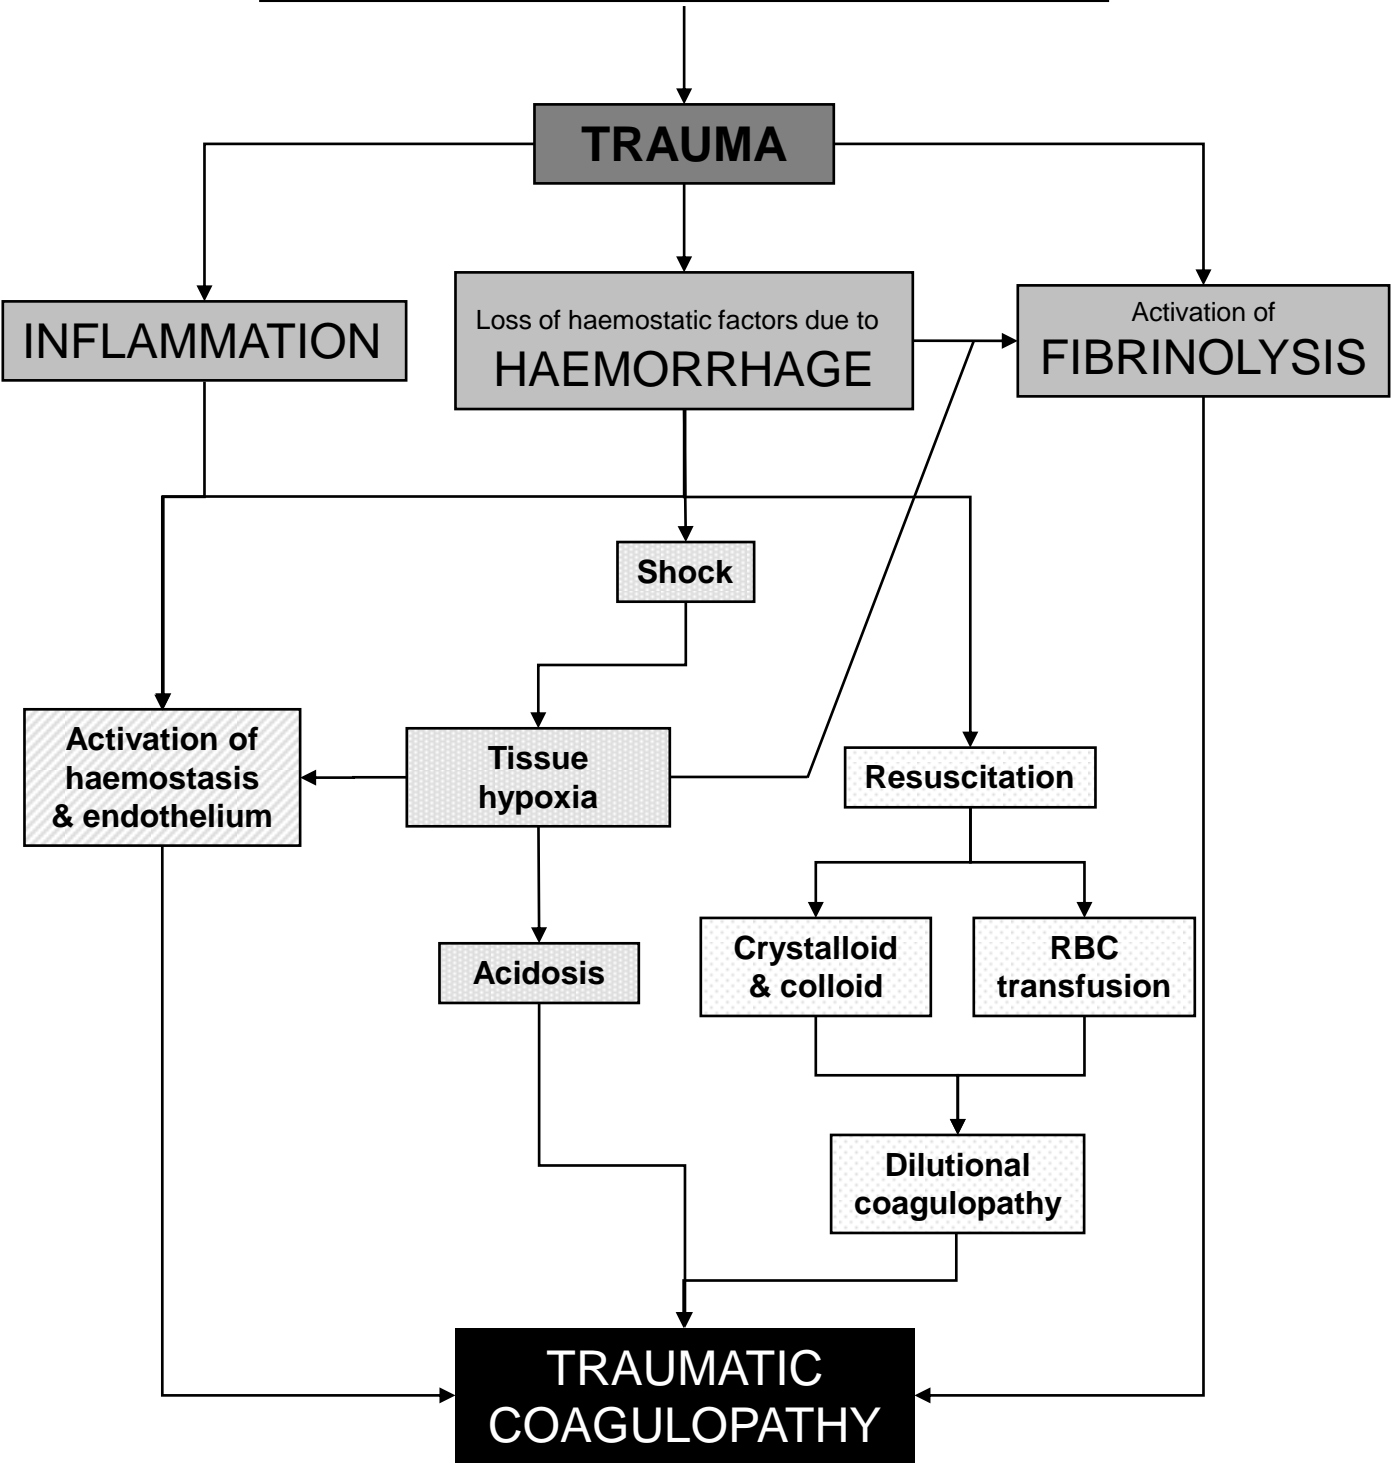

Supplement: MOESM3 [file 9711558]
